# Supplementary material for: The Impact of Search Engine Selection and Sorting Criteria on Vaccination Beliefs and Attitudes: Two Experiments Manipulating Google Output
Source: PubMed Central journal article supplement (PMC4004139; doi:10.2196/jmir.2642), 2014-04-02
Supplement: jmir_v16i4e100_app3.pdf [file jmir_v16i4e100_app3.pdf]

## Fill in your Mturk Worker ID

---

To start the Searching phase, please fill in your Mturk worker ID in the form below.

Continue

Powered by [Drupal](#)

## Fill in your Mturk Worker ID

---

To start the Questionnaire phase, please fill in your Mturk work ID in the form below.

Continue

Powered by [Drupal](#)
