# Supplementary material for: The Impact of Search Engine Selection and Sorting Criteria on Vaccination Beliefs and Attitudes: Two Experiments Manipulating Google Output
Source: PubMed Central journal article supplement (PMC4004139; doi:10.2196/jmir.2642), 2014-04-02
Supplement: jmir_v16i4e100_app4.pdf [file jmir_v16i4e100_app4.pdf]

## Descriptives

| Experimental Groups                  |                                     | Statistic                                    |                                              |
|--------------------------------------|-------------------------------------|----------------------------------------------|----------------------------------------------|
| Group 0:10 (Only<br>provaccination)  | Mean                                | 36.33                                        |                                              |
|                                      | 95% Confidence Interval<br>for Mean | Lower Bound<br>Upper Bound<br>32.06<br>40.61 |                                              |
|                                      | 5% Trimmed Mean                     | 35.91                                        |                                              |
|                                      | Median                              | 33.00                                        |                                              |
|                                      | Std. Deviation                      | 11.454                                       |                                              |
|                                      | Minimum                             | 20                                           |                                              |
|                                      | Maximum                             | 61                                           |                                              |
|                                      | Group 4:6                           | Mean                                         | 36.22                                        |
|                                      |                                     | 95% Confidence Interval<br>for Mean          | Lower Bound<br>Upper Bound<br>32.81<br>39.63 |
|                                      |                                     | 5% Trimmed Mean                              | 35.54                                        |
| Median                               |                                     | 32.00                                        |                                              |
| Std. Deviation                       |                                     | 11.356                                       |                                              |
| Minimum                              |                                     | 22                                           |                                              |
| Maximum                              |                                     | 69                                           |                                              |
| Group 6:4                            |                                     | Mean                                         | 38.56                                        |
|                                      | 95% Confidence Interval<br>for Mean | Lower Bound<br>Upper Bound<br>34.23<br>42.89 |                                              |
|                                      | 5% Trimmed Mean                     | 38.35                                        |                                              |
|                                      | Median                              | 36.50                                        |                                              |
|                                      | Std. Deviation                      | 12.013                                       |                                              |
|                                      | Minimum                             | 20                                           |                                              |
|                                      | Maximum                             | 61                                           |                                              |
|                                      | Group 8:2                           | Mean                                         | 37.87                                        |
| 95% Confidence Interval<br>for Mean  |                                     | Lower Bound<br>Upper Bound<br>34.29<br>41.45 |                                              |
| 5% Trimmed Mean                      |                                     | 37.62                                        |                                              |
| Median                               |                                     | 37.00                                        |                                              |
| Std. Deviation                       |                                     | 9.766                                        |                                              |
| Minimum                              |                                     | 22                                           |                                              |
| Maximum                              |                                     | 59                                           |                                              |
| Group 10:0 (Only<br>antivaccination) |                                     | Mean                                         | 39.69                                        |
|                                      | 95% Confidence Interval<br>for Mean | Lower Bound<br>Upper Bound<br>34.39<br>44.99 |                                              |
|                                      | 5% Trimmed Mean                     | 39.25                                        |                                              |
|                                      | Median                              | 35.00                                        |                                              |
|                                      | Std. Deviation                      | 13.939                                       |                                              |
|                                      | Minimum                             | 21                                           |                                              |
|                                      | Maximum                             | 66                                           |                                              |
| Control Group (Normal<br>Google)     | Mean                                | 35.77                                        |                                              |
|                                      | 95% Confidence Interval<br>for Mean | Lower Bound<br>Upper Bound<br>32.09<br>39.44 |                                              |

Year of birth

---

|                 |       |
|-----------------|-------|
| 5% Trimmed Mean | 35.52 |
| Median          | 35.50 |
| Std. Deviation  | 9.849 |
| Minimum         | 21    |
| Maximum         | 56    |

---

| Experimental Group                      | Self-reported Profession                     |
|-----------------------------------------|----------------------------------------------|
| <b>Group 0:10 (only provaccination)</b> | Manager - Retail Product Development         |
|                                         | Web Designer                                 |
|                                         | student                                      |
|                                         | Information Technology Consultant/Contractor |
|                                         | Furniture restorer                           |
|                                         | Artist                                       |
|                                         | Homemaker                                    |
|                                         | Sales Associate                              |
|                                         | self-employed                                |
|                                         | transcriptionist                             |
|                                         | retail sales                                 |
|                                         | Entry level Scientist                        |
|                                         | Unemployed                                   |
|                                         | homemaker                                    |
|                                         | Biomedical Engineer                          |
|                                         | IT Manager, temporarily unemployed           |
|                                         | Teacher (Special Education)                  |
|                                         | civil engineer                               |
|                                         | Media Coordinator                            |
|                                         | unemployed                                   |
|                                         | Insurance Sales                              |
|                                         | Mathematician                                |
|                                         | Student                                      |
|                                         | Freelancer                                   |
|                                         | IT                                           |
|                                         | Electrician assistant                        |
|                                         | WAHM                                         |
|                                         | unemployed                                   |
|                                         | retired                                      |
|                                         | Software developer                           |
|                                         | <b>Group 4:6</b>                             |
| Independent Contractor                  |                                              |
| marketing associate                     |                                              |
| Hotel Management                        |                                              |
| LMT                                     |                                              |
| Business Management                     |                                              |
| clerical                                |                                              |
| HOMEMAKER                               |                                              |
| Accounts Manager                        |                                              |
| retired                                 |                                              |
| sr executive in finance section         |                                              |
| unemployed                              |                                              |

Food Service/Delivery

web designer

data entry

designer

Legal Process

Consultant

IT (Hardware)

Associate

Technical

software engineer

Work at home

p.c technician

homemaker

Software Engineer

STUDENT

SENIOR MANAGER

cook

HR manager

Assistant Manager - Admn

service

embryologist

nursing

Tax Accountant

Housewife

Homemaker

Field Engineer

Teacher

Unemployed

Manager

none

Commercial Sales Manager

homemaker

freelance writer

**Group 6:4**

Aviation

Day Trader

Project writer

retail management

Image Editor

Independent Contractor

clerk

Unemployed

office manager

Student

sales rep  
 Freelance writer & editor  
 Teacher  
 office clerk  
 Administrative Assistant  
 tutor  
 Contractor  
 Retail  
 Magazine columnist  
 manager  
 Office Manager  
 Sales  
 Entertainer  
 teacher  
 homemaker  
 Freelancer  
 Meat Clerk  
 Child Care Worker/self-employed  
 unemployed  
 retail sales  
 analyst  
 Student

**Group 8:2**

Farmer  
 accountant  
 Homemaker/Mom  
 Lawyer  
 Computer Programmer  
 In home services provider  
 Student  
 homemaker  
 Social Services  
 process analyst  
 bookkeeper  
 X Ray Technician  
 Analyst  
 Licensed marriage and family therapist and writer  
 transcriptionist  
 mturker  
 Manager  
 Administrative Support Staff  
 Administrative Assistant  
 Admin Asst  
 Barista

|                                          |                                 |
|------------------------------------------|---------------------------------|
|                                          | Administrative assistant        |
|                                          | Customer Service Representative |
|                                          | Self Employed Microtaskworker   |
|                                          | Heavy equipment operator        |
|                                          | HVAC Technician                 |
|                                          | Customer support                |
|                                          | office worker                   |
|                                          | Auto Mechanic                   |
|                                          | Teaching assistant              |
|                                          | Homemaker                       |
| <b>Group 10:0 (only antivaccination)</b> | unemployed                      |
|                                          | home health aide                |
|                                          | unemployed                      |
|                                          | Librarian                       |
|                                          | data reseacher                  |
|                                          | homemaker                       |
|                                          | Advice Worker                   |
|                                          | salesman                        |
|                                          | park maintenance                |
|                                          | Sales manager                   |
|                                          | tutor                           |
|                                          | Retail                          |
|                                          | Admin. Assistant                |
|                                          | Customer Service Rep            |
|                                          | teaching                        |
|                                          | media                           |
|                                          | RADIO DJ                        |
|                                          | journalist                      |
|                                          | Lab Manager                     |
|                                          | Legal secretary                 |
|                                          | none                            |
|                                          | self-employed                   |
|                                          | unemployed                      |
|                                          | Retired                         |
|                                          | Student                         |
|                                          | Automotive Mechanic             |
|                                          | Construction                    |
|                                          | Teacher                         |
|                                          | Intelligence Analyst            |
| <b>Normal Google (Control Group)</b>     | day trader                      |
|                                          | Customer Service Representative |
|                                          | Manager                         |
|                                          | Surgical Technologist           |

Substitute Teacher/Tutor

artist

Self employed

Media

Television Broadcast

Student

Customer Service Agent

Marketing

Biologist

student

house keeping

insurance

student

Medical Researcher

Field Manager

unemployed

stay at home mom

Financial Analyst

Student/student librarian

Homemaker\\Turker

Tupperware Consultant

School Counselor

retail clerk

IT Manager

Operation Support (Law Firm)

Freelance writer
