# Supplementary material for: The Impact of Search Engine Selection and Sorting Criteria on Vaccination Beliefs and Attitudes: Two Experiments Manipulating Google Output
Source: PubMed Central journal article supplement (PMC4004139; doi:10.2196/jmir.2642), 2014-04-02
Supplement: jmir_v16i4e100_app5.pdf [file jmir_v16i4e100_app5.pdf]

## Experiment 1

|                                                                            |                   |                   | Experimental Group               |                                        |                                         | Total |
|----------------------------------------------------------------------------|-------------------|-------------------|----------------------------------|----------------------------------------|-----------------------------------------|-------|
|                                                                            |                   |                   | Control Group<br>(Normal Google) | Group 0:10<br>(Only<br>provaccination) | Group 10:0<br>(Only<br>antivaccination) |       |
| Did you ever know<br>someone who had a<br>bad experience from<br>vaccines? | Yes               | Count             | 1                                | 3                                      | 2                                       | 6     |
|                                                                            |                   | Expected<br>Count | 1.8                              | 2.2                                    | 2.0                                     | 6.0   |
|                                                                            | No                | Count             | 11                               | 11                                     | 11                                      | 33    |
|                                                                            |                   | Expected<br>Count | 10.2                             | 11.8                                   | 11.0                                    | 33.0  |
| Total                                                                      | Count             | 12                | 14                               | 13                                     | 39                                      |       |
|                                                                            | Expected<br>Count | 12.0              | 14.0                             | 13.0                                   | 39.0                                    |       |

### Chi-Square Tests

|                     | Value             | df | Asymp. Sig.<br>(2-sided) | Exact Sig.<br>(2-sided) |
|---------------------|-------------------|----|--------------------------|-------------------------|
| Pearson Chi-Square  | .851 <sup>a</sup> | 2  | .653                     | .856                    |
| Fisher's Exact Test | .895              |    |                          | .856                    |
| N of Valid Cases    | 39                |    |                          |                         |

a. 3 cells (50.0%) have expected count less than 5. The minimum expected count is 1.85.

|                                                                                                           |                   |                   | Experimental Group               |                                        |                                         | Total |
|-----------------------------------------------------------------------------------------------------------|-------------------|-------------------|----------------------------------|----------------------------------------|-----------------------------------------|-------|
|                                                                                                           |                   |                   | Control Group<br>(Normal Google) | Group 0:10<br>(Only<br>provaccination) | Group 10:0<br>(Only<br>antivaccination) |       |
| Have you ever had<br>training for a job in the<br>medical field or worked<br>in a medical<br>environment? | Yes               | Count             | 0                                | 3                                      | 1                                       | 4     |
|                                                                                                           |                   | Expected<br>Count | 1.2                              | 1.4                                    | 1.3                                     | 4.0   |
|                                                                                                           | No                | Count             | 12                               | 11                                     | 12                                      | 35    |
|                                                                                                           |                   | Expected<br>Count | 10.8                             | 12.6                                   | 11.7                                    | 35.0  |
| Total                                                                                                     | Count             | 12                | 14                               | 13                                     | 39                                      |       |
|                                                                                                           | Expected<br>Count | 12.0              | 14.0                             | 13.0                                   | 39.0                                    |       |

### Chi-Square Tests

|                     | Value              | df | Asymp. Sig.<br>(2-sided) | Exact Sig.<br>(2-sided) |
|---------------------|--------------------|----|--------------------------|-------------------------|
| Pearson Chi-Square  | 3.363 <sup>a</sup> | 2  | .186                     | .300                    |
| Fisher's Exact Test | 2.781              |    |                          | .300                    |
| N of Valid Cases    | 39                 |    |                          |                         |

a. 3 cells (50.0%) have expected count less than 5. The minimum expected count is 1.23.

|       |                   | Experimental Group               |                                        |                                         | Total |      |
|-------|-------------------|----------------------------------|----------------------------------------|-----------------------------------------|-------|------|
|       |                   | Control Group<br>(Normal Google) | Group 0:10<br>(Only<br>provaccination) | Group 10:0<br>(Only<br>antivaccination) |       |      |
| Sex   | Male              | Count                            | 4                                      | 3                                       | 1     | 8    |
|       |                   | Expected<br>Count                | 2.5                                    | 2.9                                     | 2.7   | 8.0  |
|       | Female            | Count                            | 8                                      | 11                                      | 12    | 31   |
|       |                   | Expected<br>Count                | 9.5                                    | 11.1                                    | 10.3  | 31.0 |
| Total | Count             | 12                               | 14                                     | 13                                      | 39    |      |
|       | Expected<br>Count | 12.0                             | 14.0                                   | 13.0                                    | 39.0  |      |

### Chi-Square Tests

|                     | Value              | df | Asymp. Sig.<br>(2-sided) | Exact Sig.<br>(2-sided) |
|---------------------|--------------------|----|--------------------------|-------------------------|
| Pearson Chi-Square  | 2.527 <sup>a</sup> | 2  | .283                     | .294                    |
| Fisher's Exact Test | 2.463              |    |                          | .330                    |
| N of Valid Cases    | 39                 |    |                          |                         |

a. 3 cells (50.0%) have expected count less than 5. The minimum expected count is 2.46.

### ANOVA

| Age            | Sum of<br>Squares | df | Mean Square | F     | Sig. |
|----------------|-------------------|----|-------------|-------|------|
| Between Groups | .805              | 2  | .402        | 1.843 | .173 |
| Within Groups  | 7.862             | 36 | .218        |       |      |
| Total          | 8.667             | 38 |             |       |      |

## Experiment 2

|                    |                          | Experimental Groups                    |           |           |          |      |
|--------------------|--------------------------|----------------------------------------|-----------|-----------|----------|------|
|                    |                          | Group 0:10<br>(Only<br>provaccination) | Group 4:6 | Group 6:4 | Group 8: |      |
| Level of education | High School              | Count                                  | 3         | 4         | 5        | 6    |
|                    |                          | Expected<br>Count                      | 5.3       | 8.0       | 5.7      | 5.5  |
|                    | College or<br>University | Count                                  | 27        | 41        | 26       | 25   |
|                    |                          | Expected<br>Count                      | 24.4      | 36.5      | 26.0     | 25.2 |
|                    | Vocational<br>Training   | Count                                  | 0         | 0         | 1        | 0    |
|                    |                          | Expected<br>Count                      | .3        | .5        | .3       | .3   |
| Total              | Count                    | 30                                     | 45        | 32        | 31       |      |
|                    | Expected<br>Count        | 30.0                                   | 45.0      | 32.0      | 31.0     |      |

|                    |                          | Experimental Groups                     |                                     |       | Total |
|--------------------|--------------------------|-----------------------------------------|-------------------------------------|-------|-------|
|                    |                          | Group 10:0<br>(Only<br>antivaccination) | Control Group<br>(Normal<br>Google) |       |       |
| Level of education | High School              | Count                                   | 7                                   | 10    | 35    |
|                    |                          | Expected Count                          | 5.2                                 | 5.3   | 35.0  |
|                    | College or<br>University | Count                                   | 22                                  | 19    | 160   |
|                    |                          | Expected Count                          | 23.6                                | 24.4  | 160.0 |
|                    | Vocational Training      | Count                                   | 0                                   | 1     | 2     |
|                    |                          | Expected Count                          | .3                                  | .3    | 2.0   |
| Total              | Count                    | 29                                      | 30                                  | 197   |       |
|                    | Expected Count           | 29.0                                    | 30.0                                | 197.0 |       |

### Chi-Square Tests

|                     | Value               | df | Asymp. Sig.<br>(2-sided) | Exact Sig.<br>(2-sided) |
|---------------------|---------------------|----|--------------------------|-------------------------|
| Pearson Chi-Square  | 14.370 <sup>a</sup> | 10 | .157                     | .142                    |
| Fisher's Exact Test | 13.714              |    |                          | .084                    |
| N of Valid Cases    | 197                 |    |                          |                         |

a. 6 cells (33.3%) have expected count less than 5. The minimum expected count is .29.

|                                                                                               |           |                | Experimental Groups                    |           |           |           |
|-----------------------------------------------------------------------------------------------|-----------|----------------|----------------------------------------|-----------|-----------|-----------|
|                                                                                               |           |                | Group 0:10<br>(Only<br>provaccination) | Group 4:6 | Group 6:4 | Group 8:2 |
| Have you ever had training for a job in the medical field or worked in a medical environment? | No        | Count          | 25                                     | 36        | 29        | 25        |
|                                                                                               |           | Expected Count | 25.3                                   | 37.9      | 27.0      | 26.1      |
|                                                                                               | Yes       | Count          | 5                                      | 8         | 3         | 6         |
|                                                                                               |           | Expected Count | 4.6                                    | 6.9       | 4.9       | 4.7       |
|                                                                                               | No Answer | Count          | 0                                      | 1         | 0         | 0         |
|                                                                                               |           | Expected Count | .2                                     | .2        | .2        | .2        |
|                                                                                               | Total     | Count          | 30                                     | 45        | 32        | 31        |
|                                                                                               |           | Expected Count | 30.0                                   | 45.0      | 32.0      | 31.0      |

|                                                                                               |                |                | Experimental Groups                     |                                     | Total |
|-----------------------------------------------------------------------------------------------|----------------|----------------|-----------------------------------------|-------------------------------------|-------|
|                                                                                               |                |                | Group 10:0<br>(Only<br>antivaccination) | Control Group<br>(Normal<br>Google) |       |
| Have you ever had training for a job in the medical field or worked in a medical environment? | No             | Count          | 26                                      | 25                                  | 166   |
|                                                                                               |                | Expected Count | 24.4                                    | 25.3                                | 166.0 |
|                                                                                               | Yes            | Count          | 3                                       | 5                                   | 30    |
|                                                                                               |                | Expected Count | 4.4                                     | 4.6                                 | 30.0  |
|                                                                                               | No Answer      | Count          | 0                                       | 0                                   | 1     |
|                                                                                               |                | Expected Count | .1                                      | .2                                  | 1.0   |
| Total                                                                                         | Count          | 29             | 30                                      | 197                                 |       |
|                                                                                               | Expected Count | 29.0           | 30.0                                    | 197.0                               |       |

### Chi-Square Tests

|                     | Value              | df | Asymp. Sig.<br>(2-sided) | Exact Sig.<br>(2-sided) |
|---------------------|--------------------|----|--------------------------|-------------------------|
| Pearson Chi-Square  | 5.577 <sup>a</sup> | 10 | .849                     | .960                    |
| Fisher's Exact Test | 6.862              |    |                          | .909                    |
| N of Valid Cases    | 197                |    |                          |                         |

a. 11 cells (61.1%) have expected count less than 5. The minimum expected count is .15.

|                                                                            |                   |                   | Experimental Groups                    |           |           |           |
|----------------------------------------------------------------------------|-------------------|-------------------|----------------------------------------|-----------|-----------|-----------|
|                                                                            |                   |                   | Group 0:10<br>(Only<br>provaccination) | Group 4:6 | Group 6:4 | Group 8:2 |
| Did you ever know<br>someone who had any<br>side effects from<br>vaccines? | No                | Count             | 23                                     | 34        | 26        | 24        |
|                                                                            |                   | Expected<br>Count | 23.0                                   | 34.5      | 24.5      | 23.8      |
|                                                                            | Yes               | Count             | 7                                      | 11        | 6         | 7         |
|                                                                            |                   | Expected<br>Count | 6.9                                    | 10.3      | 7.3       | 7.1       |
|                                                                            | No<br>Answer      | Count             | 0                                      | 0         | 0         | 0         |
|                                                                            |                   | Expected<br>Count | .2                                     | .2        | .2        | .2        |
| Total                                                                      | Count             | 30                | 45                                     | 32        | 31        |           |
|                                                                            | Expected<br>Count | 30.0              | 45.0                                   | 32.0      | 31.0      |           |

|                                                                         |                   |                   | Experimental Groups                     |                                     |       |
|-------------------------------------------------------------------------|-------------------|-------------------|-----------------------------------------|-------------------------------------|-------|
|                                                                         |                   |                   | Group 10:0<br>(Only<br>antivaccination) | Control Group<br>(Normal<br>Google) | Total |
| Did you ever know<br>someone who had any side<br>effects from vaccines? | No                | Count             | 21                                      | 23                                  | 151   |
|                                                                         |                   | Expected<br>Count | 22.2                                    | 23.0                                | 151.0 |
|                                                                         | Yes               | Count             | 7                                       | 7                                   | 45    |
|                                                                         |                   | Expected<br>Count | 6.6                                     | 6.9                                 | 45.0  |
|                                                                         | No<br>Answer      | Count             | 1                                       | 0                                   | 1     |
|                                                                         |                   | Expected<br>Count | .1                                      | .2                                  | 1.0   |
| Total                                                                   | Count             | 29                | 30                                      | 197                                 |       |
|                                                                         | Expected<br>Count | 29.0              | 30.0                                    | 197.0                               |       |

### Chi-Square Tests

|                     | Value              | df | Asymp. Sig.<br>(2-sided) | Exact Sig.<br>(2-sided) |
|---------------------|--------------------|----|--------------------------|-------------------------|
| Pearson Chi-Square  | 6.273 <sup>a</sup> | 10 | .792                     | .921                    |
| Fisher's Exact Test | 6.056              |    |                          | .977                    |
| N of Valid Cases    | 197                |    |                          |                         |

a. 6 cells (33.3%) have expected count less than 5. The minimum expected count is .15.

|       |                | Experimental Groups                 |           |           |           |                                      |      | Control Group<br>(Normal Google) |
|-------|----------------|-------------------------------------|-----------|-----------|-----------|--------------------------------------|------|----------------------------------|
|       |                | Group 0:10<br>(Only provaccination) | Group 4:6 | Group 6:4 | Group 8:2 | Group 10:0<br>(Only antivaccination) |      |                                  |
| Sex   | Male           | Count                               | 15        | 22        | 24        | 20                                   | 20   | 20                               |
|       |                | Expected Count                      | 18.4      | 27.6      | 19.7      | 19.0                                 | 17.8 | 18.4                             |
|       | Female         | Count                               | 15        | 23        | 8         | 11                                   | 9    | 10                               |
|       |                | Expected Count                      | 11.6      | 17.4      | 12.3      | 12.0                                 | 11.2 | 11.6                             |
| Total | Count          | 30                                  | 45        | 32        | 31        | 29                                   | 30   |                                  |
|       | Expected Count | 30.0                                | 45.0      | 32.0      | 31.0      | 29.0                                 | 30.0 |                                  |

|       |                | Total          |       |
|-------|----------------|----------------|-------|
| Sex   | Male           | Count          | 121   |
|       |                | Expected Count | 121.0 |
|       | Female         | Count          | 76    |
|       |                | Expected Count | 76.0  |
| Total | Count          | 197            |       |
|       | Expected Count | 197.0          |       |

### Chi-Square Tests

|                     | Value              | df | Asymp. Sig.<br>(2-sided) | Exact Sig.<br>(2-sided) |
|---------------------|--------------------|----|--------------------------|-------------------------|
| Pearson Chi-Square  | 8.294 <sup>a</sup> | 5  | .141                     | .142                    |
| Fisher's Exact Test | 8.130              |    |                          | .148                    |
| N of Valid Cases    | 197                |    |                          |                         |

a. 0 cells (0.0%) have expected count less than 5. The minimum expected count is 11.19.

### ANOVA

| Age            | Sum of Squares | df  | Mean Square | F    | Sig. |
|----------------|----------------|-----|-------------|------|------|
| Between Groups | 377.476        | 5   | 75.495      | .575 | .719 |
| Within Groups  | 25067.377      | 191 | 131.243     |      |      |
| Total          | 25444.853      | 196 |             |      |      |
