# Supplementary material for: The Impact of Search Engine Selection and Sorting Criteria on Vaccination Beliefs and Attitudes: Two Experiments Manipulating Google Output
Source: PubMed Central journal article supplement (PMC4004139; doi:10.2196/jmir.2642), 2014-04-02

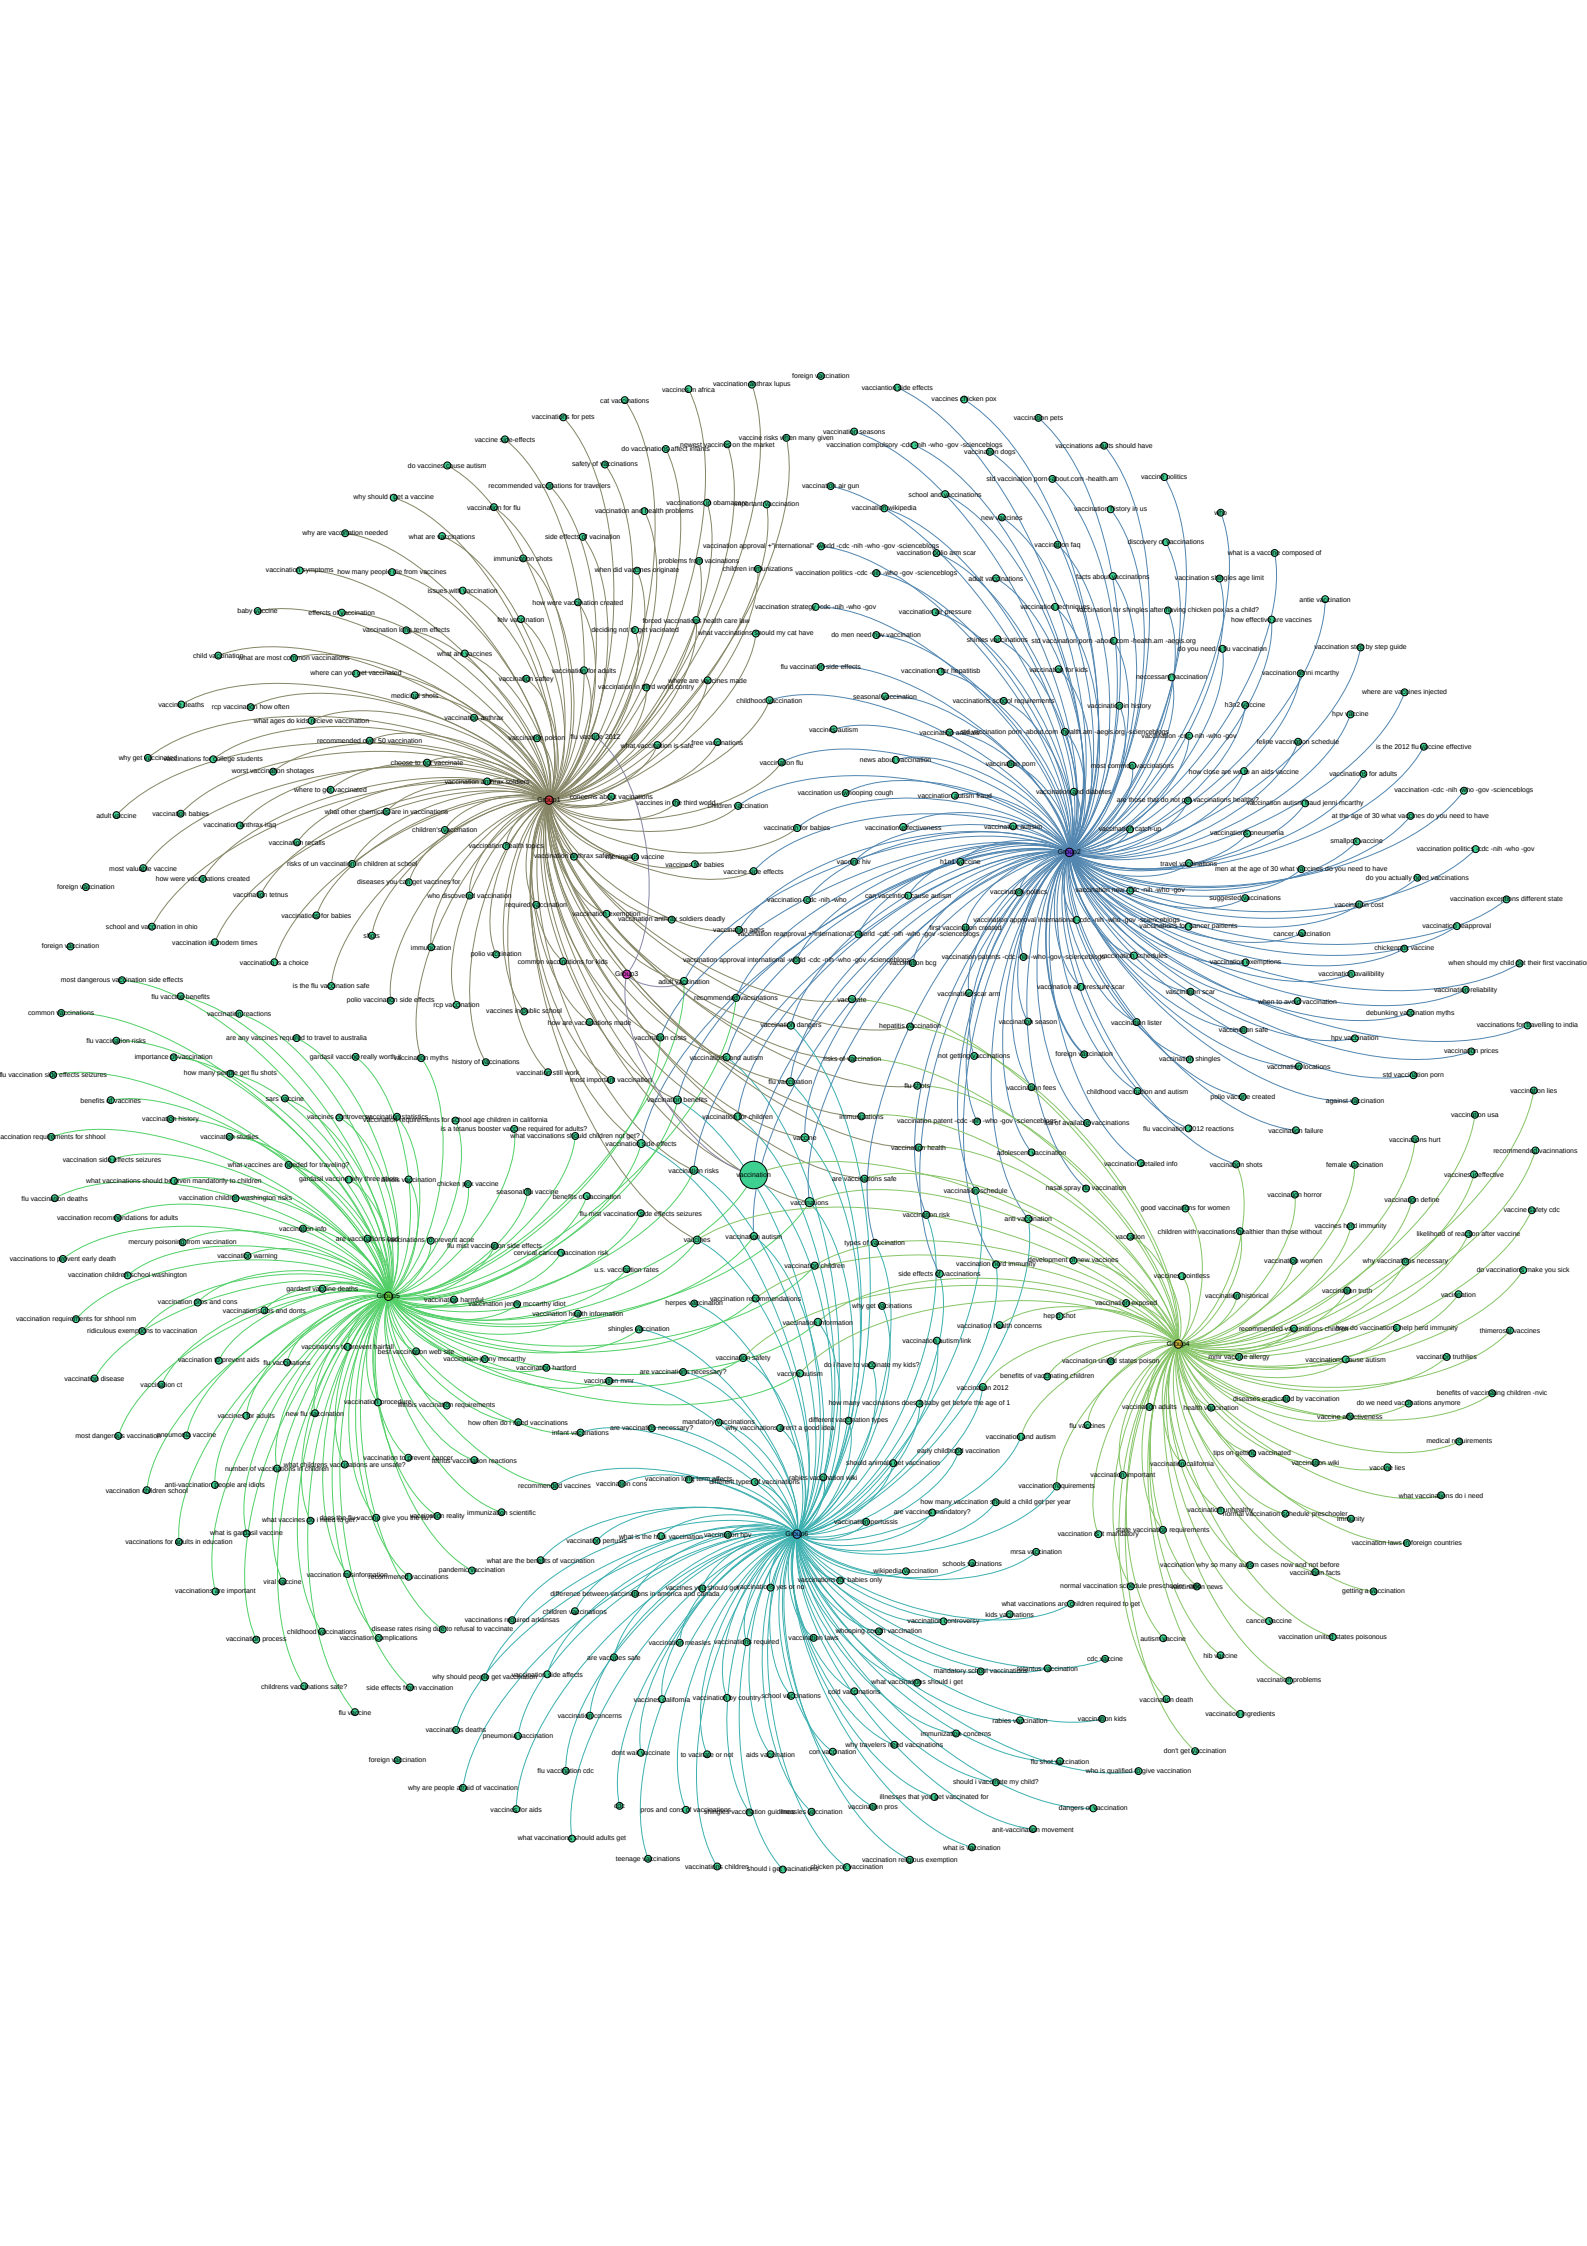

Supplement: jmir_v16i4e100_app6.pdf [file jmir_v16i4e100_app6.pdf]
